# Supplementary material for: Genomic profiling of CHEK2*1100delC-mutated breast carcinomas
Source: BMC Cancer. 2015 Nov 9;15:877. doi: 10.1186/s12885-015-1880-y (PMC4640207; doi:10.1186/s12885-015-1880-y)
Supplement: Additional file 1: — Immune signature probe-sets. Excel spreadsheet with a list of probe-sets constituting the immune signature. (XLSX 18 kb) [file 12885_2015_1880_MOESM1_ESM.xlsx]

## Sheet: list of probesets
Additional file 1: Immune signature Probesets
Probeset ID	Gene Symbol	Gene Title	RefSeq Transcript ID
1552497_a_at	SLAMF6	SLAM family member 6	NM_001184714 /// NM_001184715 /// NM_001184716 /// NM_052931
1555759_a_at	CCL5	chemokine (C-C motif) ligand 5	NM_002985
1555779_a_at	CD79A	CD79a molecule, immunoglobulin-associated alpha	NM_001783 /// NM_021601
202957_at	HCLS1	hematopoietic cell-specific Lyn substrate 1	NM_005335
203047_at	STK10	serine/threonine kinase 10	NM_005990
203332_s_at	INPP5D	inositol polyphosphate-5-phosphatase, 145kDa	NM_001017915 /// NM_005541
203416_at	CD53	CD53 molecule	NM_000560 /// NM_001040033
203470_s_at	PLEK	pleckstrin	NM_002664
203471_s_at	PLEK	pleckstrin	NM_002664
203879_at	PIK3CD	phosphoinositide-3-kinase, catalytic, delta polypeptide	NM_005026
203923_s_at	CYBB	cytochrome b-245, beta polypeptide	NM_000397
204116_at	IL2RG	interleukin 2 receptor, gamma	NM_000206
204118_at	CD48	CD48 molecule	NM_001778
204153_s_at	MFNG	MFNG O-fucosylpeptide 3-beta-N-acetylglucosaminyltransferase	NM_001166343 /// NM_002405 /// NR_029413
204265_s_at	GPSM3	G-protein signaling modulator 3	NM_022107
204562_at	IRF4	interferon regulatory factor 4	NM_001195286 /// NM_002460 /// NR_036585
204563_at	SELL	selectin L	NM_000655 /// NR_029467
204661_at	CD52	CD52 molecule	NM_001803
204714_s_at	F5	coagulation factor V (proaccelerin, labile factor)	NM_000130
204777_s_at	MAL	mal, T-cell differentiation protein	NM_002371 /// NM_022438 /// NM_022439 /// NM_022440
204890_s_at	LCK	lymphocyte-specific protein tyrosine kinase	NM_001042771 /// NM_005356
204891_s_at	LCK	lymphocyte-specific protein tyrosine kinase	NM_001042771 /// NM_005356
204912_at	IL10RA	interleukin 10 receptor, alpha	NM_001558 /// NR_026691
204923_at	SASH3	SAM and SH3 domain containing 3	NM_018990
204929_s_at	VAMP5	vesicle-associated membrane protein 5 (myobrevin)	NM_006634
204960_at	PTPRCAP	protein tyrosine phosphatase, receptor type, C-associated protein	NM_005608
205147_x_at	NCF4	neutrophil cytosolic factor 4, 40kDa	NM_000631 /// NM_013416
205159_at	CSF2RB	colony stimulating factor 2 receptor, beta, low-affinity (granulocyte-macrophage	NM_000395
205213_at	ACAP1	ArfGAP with coiled-coil, ankyrin repeat and PH domains 1	NM_014716
205270_s_at	LCP2	lymphocyte cytosolic protein 2 (SH2 domain containing leukocyte protein of 76kDa	NM_005565
205291_at	IL2RB	interleukin 2 receptor, beta	NM_000878
205456_at	CD3E	CD3e molecule, epsilon (CD3-TCR complex)	NM_000733
205484_at	SIT1	signaling threshold regulating transmembrane adaptor 1	NM_014450
205685_at	CD86	CD86 molecule	NM_006889 /// NM_175862
205692_s_at	CD38	CD38 molecule	NM_001775
205758_at	CD8A	CD8a molecule	NM_001145873 /// NM_001768 /// NM_171827 /// NR_027353
205798_at	IL7R	interleukin 7 receptor	NM_002185
205804_s_at	TRAF3IP3	TRAF3 interacting protein 3	NM_025228
205821_at	KLRK1	killer cell lectin-like receptor subfamily K, member 1	NM_007360
205831_at	CD2	CD2 molecule	NM_001767
206118_at	STAT4	signal transducer and activator of transcription 4	NM_003151
206150_at	CD27	CD27 molecule	NM_001242
206181_at	SLAMF1	signaling lymphocytic activation molecule family member 1	NM_003037
206337_at	CCR7	chemokine (C-C motif) receptor 7	NM_001838
206366_x_at	XCL1	chemokine (C motif) ligand 1	NM_002995
206545_at	CD28	CD28 molecule	NM_006139
206666_at	GZMK	granzyme K (granzyme 3; tryptase II)	NM_002104
206707_x_at	FAM65B	family with sequence similarity 65, member B	NM_014722 /// NM_015864
206804_at	CD3G	CD3g molecule, gamma (CD3-TCR complex)	NM_000073
206978_at	CCR2	chemokine (C-C motif) receptor 2	NM_001123041 /// NM_001123396
207238_s_at	PTPRC	protein tyrosine phosphatase, receptor type, C	NM_002838 /// NM_080921 /// NM_080923
207651_at	GPR171	G protein-coupled receptor 171	NM_013308
207734_at	LAX1	lymphocyte transmembrane adaptor 1	NM_001136190 /// NM_017773
207795_s_at	KLRD1	killer cell lectin-like receptor subfamily D, member 1	NM_001114396 /// NM_002262 /// NM_007334
209083_at	CORO1A	coronin, actin binding protein, 1A	NM_001193333 /// NM_007074
209374_s_at	IGHM	immunoglobulin heavy constant mu	---
209670_at	TRAC	T cell receptor alpha constant	---
209671_x_at	TRAC	T cell receptor alpha constant	---
209685_s_at	PRKCB	protein kinase C, beta	NM_002738 /// NM_212535
209734_at	NCKAP1L	NCK-associated protein 1-like	NM_001184976 /// NM_005337
209813_x_at	TARP	TCR gamma alternate reading frame protein	NM_001003799 /// NM_001003806
209827_s_at	IL16	interleukin 16 (lymphocyte chemoattractant factor)	NM_001172128 /// NM_004513 /// NM_172217
209879_at	SELPLG	selectin P ligand	NM_003006
209995_s_at	TCL1A	T-cell leukemia/lymphoma 1A	NM_001098725 /// NM_021966
210031_at	CD247	CD247 molecule	NM_000734 /// NM_198053
210038_at	PRKCQ	protein kinase C, theta	NM_006257
210116_at	SH2D1A	SH2 domain containing 1A	NM_001114937 /// NM_002351
210140_at	CST7	cystatin F (leukocystatin)	NM_003650
210279_at	GPR18	G protein-coupled receptor 18	NM_001098200 /// NM_005292
210356_x_at	MS4A1	membrane-spanning 4-domains, subfamily A, member 1	NM_021950 /// NM_152866
210370_s_at	LY9	lymphocyte antigen 9	NM_001033667 /// NM_002348
210439_at	ICOS	inducible T-cell co-stimulator	NM_012092
210785_s_at	C1orf38	chromosome 1 open reading frame 38	NM_001039477 /// NM_001105556 /// NM_004848
210915_x_at	TRBC1	T cell receptor beta constant 1	---
210972_x_at	TRAC /// TRAJ17 /// TRAV20	T cell receptor alpha constant /// T cell receptor alpha joining 17 /// T cell r	---
211005_at	LAT /// SPNS1	linker for activation of T cells /// spinster homolog 1 (Drosophila)	NM_001014987 /// NM_001014988 /// NM_001014989 /// NM_001142448 /// NM_001142449
211144_x_at	TARP /// TRGC2	TCR gamma alternate reading frame protein /// T cell receptor gamma constant 2	NM_001003799 /// NM_001003806
211336_x_at	LILRB1	leukocyte immunoglobulin-like receptor, subfamily B (with TM and ITIM domains),	NM_001081637 /// NM_001081638 /// NM_001081639 /// NM_006669
211339_s_at	ITK	IL2-inducible T-cell kinase	NM_005546
211582_x_at	LST1	leukocyte specific transcript 1	NM_001166538 /// NM_007161 /// NM_205837 /// NM_205838 /// NM_205839 /// NM_2058
211634_x_at	IGHM /// LOC100133862	immunoglobulin heavy constant mu /// ig heavy chain V-I region V35-like	---
211635_x_at	IGHA1 /// IGHA2 /// IGHD /// IGHG1 /// IGHG3 /// IGHG4 /// IGHM /// IGHV4-31 /// LOC100133862	immunoglobulin heavy constant alpha 1 /// immunoglobulin heavy constant alpha 2	---
211640_x_at	IGHG1 /// IGHM /// LOC100133862	immunoglobulin heavy constant gamma 1 (G1m marker) /// immunoglobulin heavy cons	---
211742_s_at	EVI2B	ecotropic viral integration site 2B	NM_006495
211796_s_at	TRBC1 /// TRBC2	T cell receptor beta constant 1 /// T cell receptor beta constant 2	---
212414_s_at	GLYR1 /// SEPT6	glyoxylate reductase 1 homolog (Arabidopsis) /// septin 6	NM_015129 /// NM_032569 /// NM_145799 /// NM_145800 /// NM_145802
212827_at	IGHM	immunoglobulin heavy constant mu	---
213160_at	DOCK2	dedicator of cytokinesis 2	NM_004946
213193_x_at	TRBC1	T cell receptor beta constant 1	---
213416_at	ITGA4	integrin, alpha 4 (antigen CD49D, alpha 4 subunit of VLA-4 receptor)	NM_000885
213539_at	CD3D	CD3d molecule, delta (CD3-TCR complex)	NM_000732 /// NM_001040651
213958_at	CD6	CD6 molecule	NM_006725
214054_at	DOK2	docking protein 2, 56kDa	NM_003974
214228_x_at	TNFRSF4	tumor necrosis factor receptor superfamily, member 4	NM_003327
214567_s_at	XCL1 /// XCL2	chemokine (C motif) ligand 1 /// chemokine (C motif) ligand 2	NM_002995 /// NM_003175
214574_x_at	LST1	leukocyte specific transcript 1	NM_001166538 /// NM_007161 /// NM_205837 /// NM_205838 /// NM_205839 /// NM_2058
214768_x_at	IGKV1-5	immunoglobulin kappa variable 1-5	---
214777_at	IGKV4-1	immunoglobulin kappa variable 4-1	---
215346_at	CD40	CD40 molecule, TNF receptor superfamily member 5	NM_001250 /// NM_152854
215388_s_at	CFH /// CFHR1	complement factor H /// complement factor H-related 1	NM_000186 /// NM_001014975 /// NM_002113
215806_x_at	TARP /// TRGC2	TCR gamma alternate reading frame protein /// T cell receptor gamma constant 2	NM_001003799 /// NM_001003806
216250_s_at	LPXN	leupaxin	NM_001143995 /// NM_004811
216920_s_at	TARP /// TRGC2	TCR gamma alternate reading frame protein /// T cell receptor gamma constant 2	NM_001003799 /// NM_001003806
217147_s_at	TRAT1	T cell receptor associated transmembrane adaptor 1	NM_016388
217235_x_at	IGLL5 /// IGLV2-11	immunoglobulin lambda-like polypeptide 5 /// immunoglobulin lambda variable 2-11	NM_001178126 /// NR_033661
218805_at	GIMAP5	GTPase, IMAP family member 5	NM_018384
218870_at	ARHGAP15	Rho GTPase activating protein 15	NM_018460
219014_at	PLAC8	placenta-specific 8	NM_001130715 /// NM_001130716 /// NM_016619
219243_at	GIMAP4	GTPase, IMAP family member 4	NM_018326
219777_at	GIMAP6	GTPase, IMAP family member 6	NM_024711 /// NR_024115
219812_at	PVRIG	poliovirus receptor related immunoglobulin domain containing	NM_024070
220132_s_at	CLEC2D	C-type lectin domain family 2, member D	NM_001004419 /// NM_001197317 /// NM_001197318 /// NM_001197319 /// NM_013269 //
220485_s_at	SIRPG	signal-regulatory protein gamma	NM_001039508 /// NM_018556 /// NM_080816
220577_at	GVINP1	GTPase, very large interferon inducible pseudogene 1	NR_003945
220684_at	TBX21	T-box 21	NM_013351
221004_s_at	ITM2C	integral membrane protein 2C	NM_001012514 /// NM_001012516 /// NM_030926
221286_s_at	MGC29506	plasma cell-induced ER protein 1	NM_016459
221969_at	PAX5	paired box 5	NM_016734
223640_at	HCST	hematopoietic cell signal transducer	NM_001007469 /// NM_014266
224356_x_at	MS4A6A	membrane-spanning 4-domains, subfamily A, member 6A	NM_022349 /// NM_152851 /// NM_152852
224404_s_at	FCRL5	Fc receptor-like 5	NM_001195388 /// NM_031281
224451_x_at	ARHGAP9	Rho GTPase activating protein 9	NM_001080156 /// NM_001080157 /// NM_032496
225622_at	PAG1	phosphoprotein associated with glycosphingolipid microdomains 1	NM_018440
226218_at	IL7R	interleukin 7 receptor	NM_002185
226219_at	ARHGAP30	Rho GTPase activating protein 30	NM_001025598 /// NM_181720
226818_at	MPEG1	macrophage expressed 1	NM_001039396
226841_at	MPEG1	macrophage expressed 1	NM_001039396
226875_at	DOCK11	dedicator of cytokinesis 11	NM_144658
227266_s_at	FYB	FYN binding protein	NM_001465 /// NM_199335
227344_at	IKZF1	IKAROS family zinc finger 1 (Ikaros)	NM_006060
227346_at	IKZF1	IKAROS family zinc finger 1 (Ikaros)	NM_006060
227354_at	PAG1	phosphoprotein associated with glycosphingolipid microdomains 1	NM_018440
228071_at	GIMAP7	GTPase, IMAP family member 7	NM_153236
228167_at	KLHL6	kelch-like 6 (Drosophila)	NM_130446
228258_at	TBC1D10C	TBC1 domain family, member 10C	NM_198517
228592_at	MS4A1	membrane-spanning 4-domains, subfamily A, member 1	NM_021950 /// NM_152866
229629_at	---	---	---
229686_at	P2RY8	purinergic receptor P2Y, G-protein coupled, 8	NM_178129
231093_at	FCRL3	Fc receptor-like 3	NM_052939
231124_x_at	LY9	lymphocyte antigen 9	NM_001033667 /// NM_002348
232543_x_at	ARHGAP9	Rho GTPase activating protein 9	NM_001080156 /// NM_001080157 /// NM_032496
233510_s_at	PARVG	parvin, gamma	NM_001137605 /// NM_001137606 /// NM_022141 /// NR_024426 /// NR_024427 /// NR_0
236280_at	---	---	---
236295_s_at	NLRC3	NLR family, CARD domain containing 3	NM_178844
239237_at	---	---	---
239294_at	---	---	---
240070_at	TIGIT	T cell immunoreceptor with Ig and ITIM domains	NM_173799
34210_at	CD52	CD52 molecule	NM_001803
36030_at	IFFO1	intermediate filament family orphan 1	NM_001039670 /// NM_001193457 /// NM_080730 /// NR_036467
38149_at	ARHGAP25	Rho GTPase activating protein 25	NM_001007231 /// NM_001166276 /// NM_001166277 /// NM_014882
40420_at	STK10	serine/threonine kinase 10	NM_005990
64064_at	GIMAP5	GTPase, IMAP family member 5	NM_018384
